# Supplementary material
Source: publisher site journal article supplement (https://www.spandidos-publications.com/2880/downloadSupplementary)

Figure S1. Results of immunohistochemical detection of MST1 expression. MST1, mammalian STE20-like protein kinase 1.

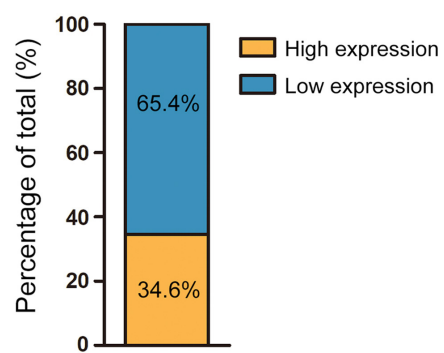

Supplement: Supplementary file 1 [file downloadSupplementary]
